# Supplementary material for: Model-based decoupling of evoked and spontaneous neural activity in calcium imaging data
Source: PubMed Central journal article supplement (PMC7728401; doi:10.1371/journal.pcbi.1008330), 2020-11-30
Supplement: pcbi.1008330.s004.pdf [file pcbi.1008330.s004.pdf]

| Parameter  | Interpretation                                       | Value             |
|------------|------------------------------------------------------|-------------------|
| $N$        | Number of neurons                                    | 1000              |
| $T$        | Simulation duration (frames)                         | 3200              |
| –          | Imaging rate (Hz)                                    | 2.5               |
| $\tau_r$   | Calcium rise time constant (frames)                  | 2.2               |
| $\tau_d$   | Calcium decay time constant (frames)                 | 4.6               |
| $K$        | Number of stimuli                                    | 100               |
| –          | Stimulus repetitions                                 | 6                 |
| –          | Interstimulus interval (frames)                      | 5                 |
| $L$        | Number of latent factors                             | 5                 |
| $\xi$      | Probability of latent factor event (per frame)       | 0.1               |
| $\pi$      | Probability of private spontaneous event (per frame) | 0.05 (0.0 - 0.3)  |
| $\gamma_x$ | Mean intensity of latent event                       | 0.1               |
| $\gamma_z$ | Mean intensity of private spontaneous event          | 0.1               |
| $\sigma^2$ | Imaging noise variance                               | 0.16 (0.04 - 0.4) |
