# Supplementary material for: Model-based decoupling of evoked and spontaneous neural activity in calcium imaging data
Source: PubMed Central journal article supplement (PMC7728401; doi:10.1371/journal.pcbi.1008330), 2020-11-30
Supplement: pcbi.1008330.s005.pdf [file pcbi.1008330.s005.pdf]

|                                  | Zebrafish |       |       |       |       |       |       |       |
|----------------------------------|-----------|-------|-------|-------|-------|-------|-------|-------|
|                                  | 1         | 2     | 3     | 4     | 5     | 6     | 7     | 8     |
| Correlation coefficient mean     | 0.67      | 0.59  | 0.54  | 0.53  | 0.63  | 0.57  | 0.61  | 0.56  |
| Correlation coefficient IQR      | 0.26      | 0.37  | 0.37  | 0.35  | 0.25  | 0.26  | 0.36  | 0.37  |
| Mean factor contribution         | 0.14      | 0.10  | 0.10  | 0.08  | 0.11  | 0.12  | 0.13  | 0.07  |
| Fraction of shared neurons       | 0.09      | 0.06  | 0.19  | 0.15  | 0.12  | 0.15  | 0.17  | 0.15  |
| Mean increase in correlation (%) | 44.02     | 30.16 | 30.17 | 34.76 | 32.70 | 35.88 | 41.56 | 23.41 |
| Mean drive ratio                 | -0.12     | 0.08  | 0.09  | 0.03  | -0.04 | -0.09 | -0.23 | 0.19  |
| Mean absolute drive ratio        | 0.57      | 0.66  | 0.56  | 0.70  | 0.58  | 0.60  | 0.61  | 0.47  |
