# Supplementary material for: Model-based decoupling of evoked and spontaneous neural activity in calcium imaging data
Source: PubMed Central journal article supplement (PMC7728401; doi:10.1371/journal.pcbi.1008330), 2020-11-30

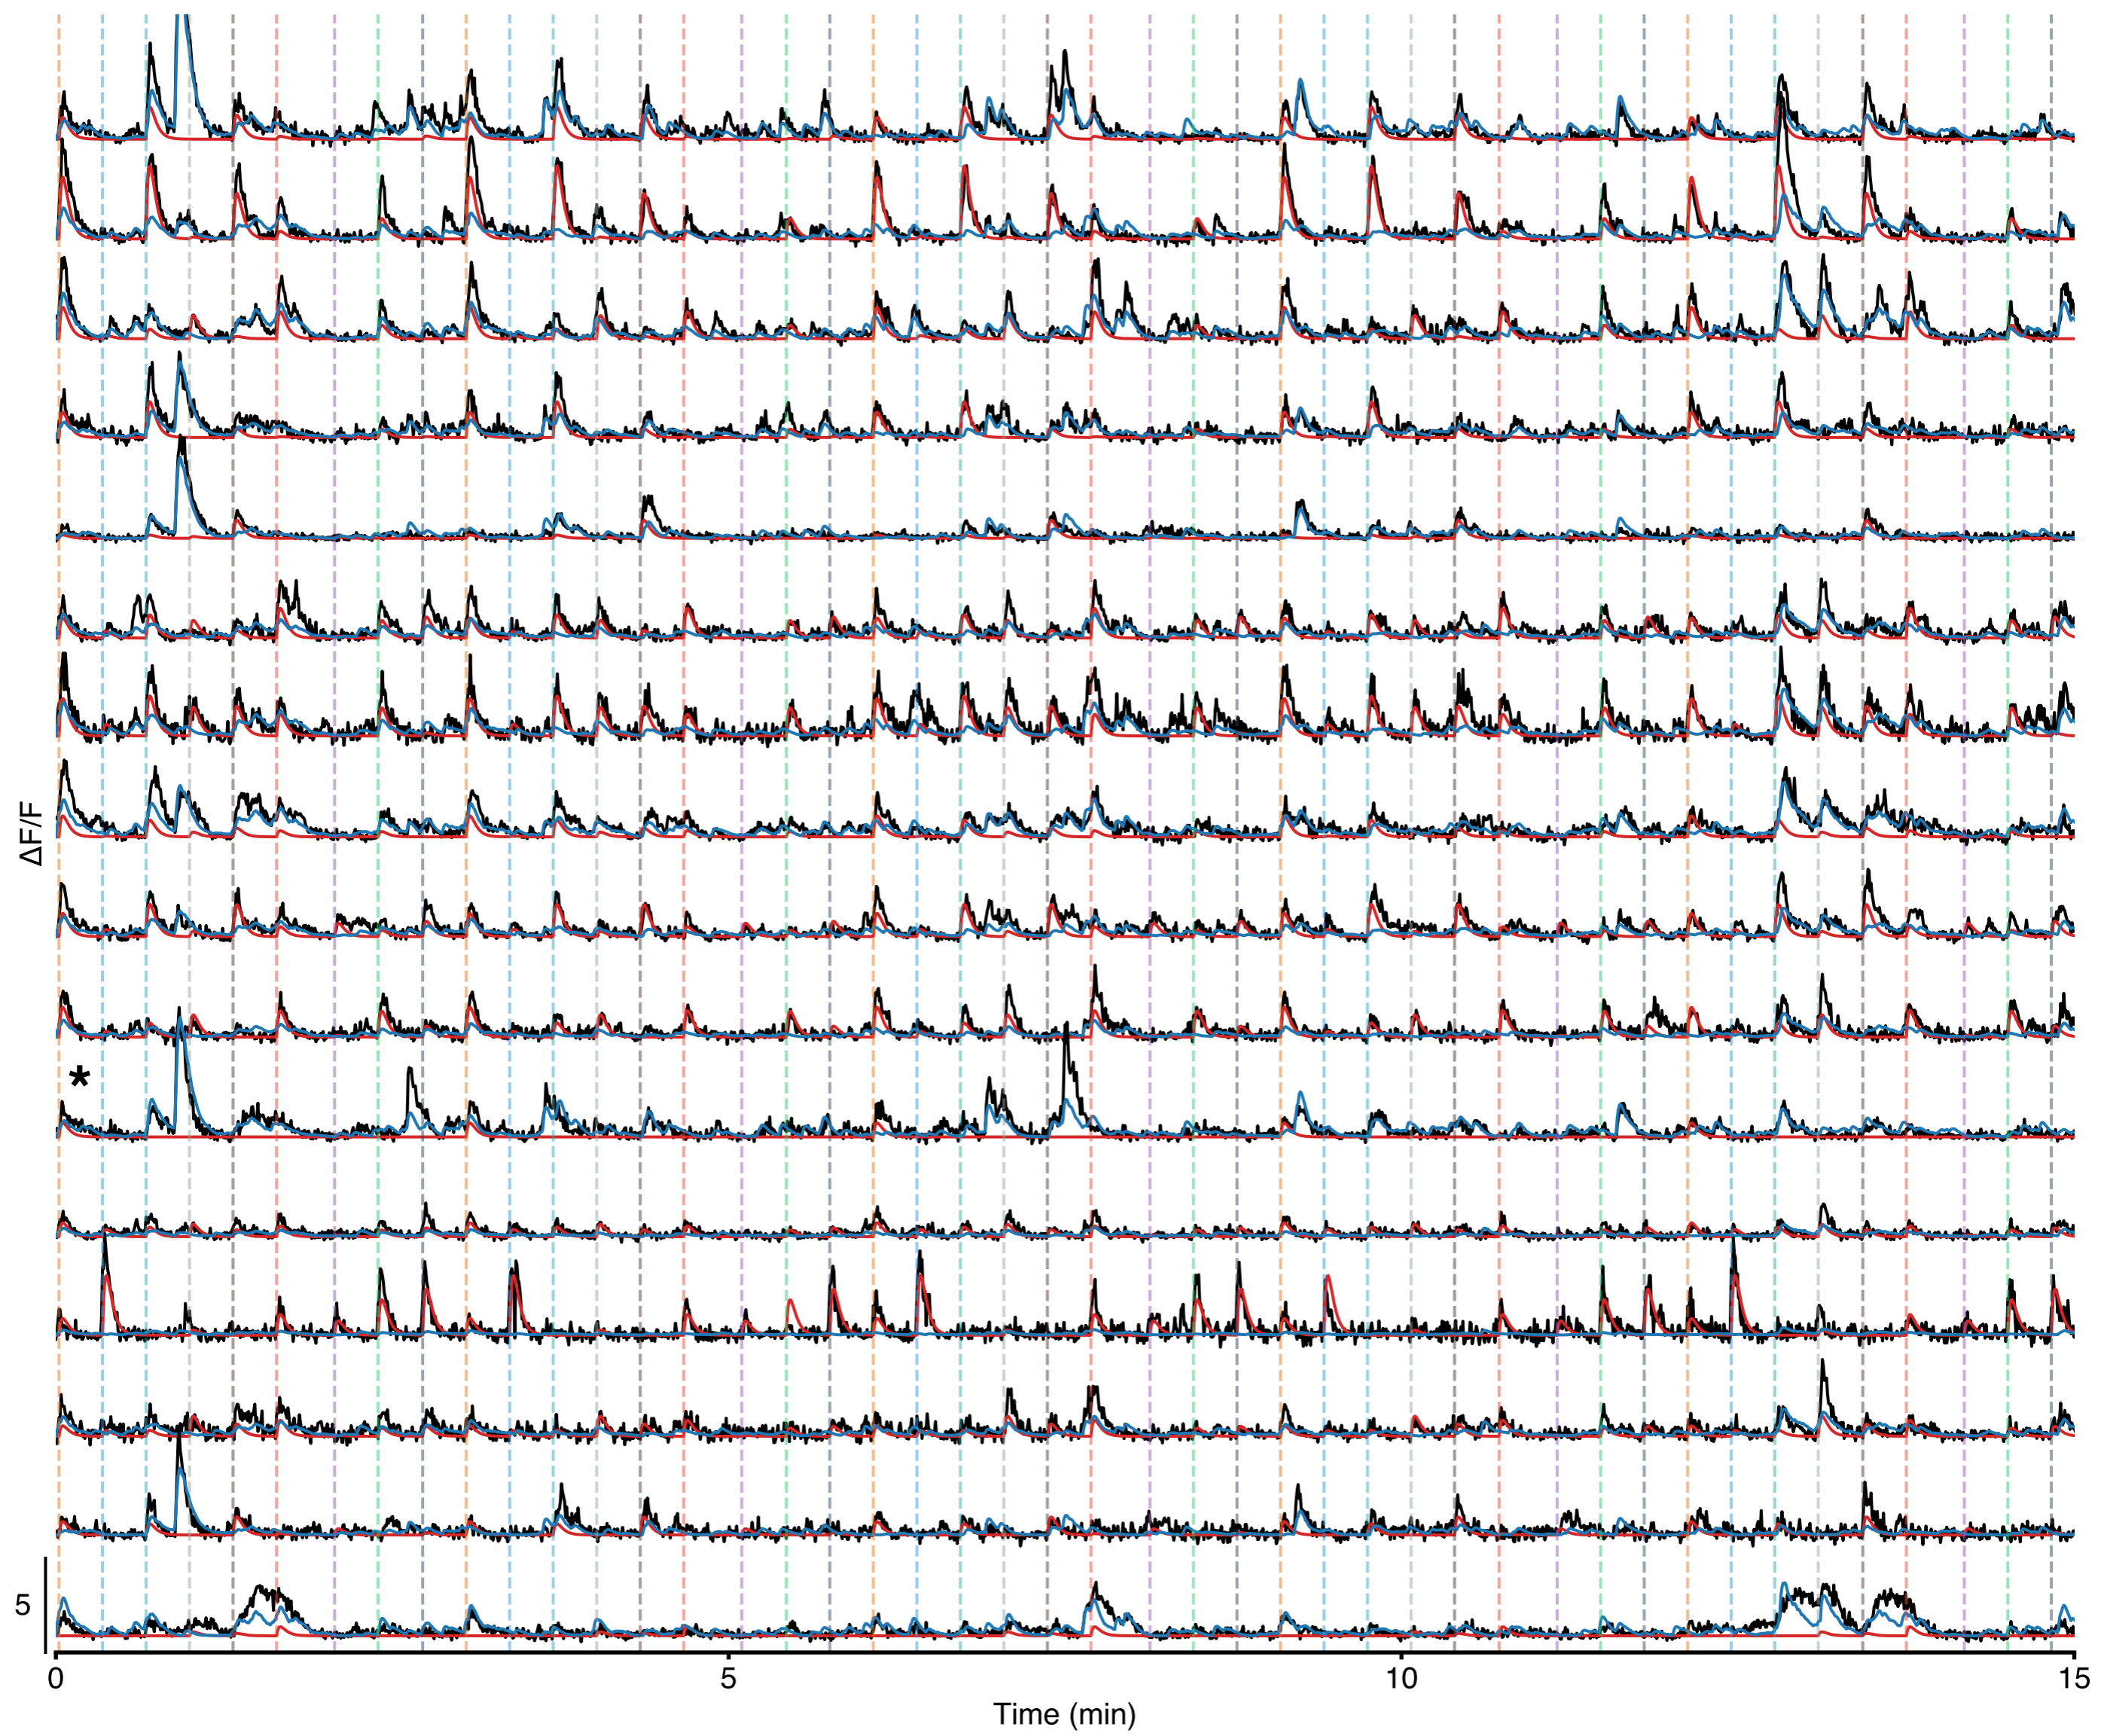

Supplement: pcbi.1008330.s013.pdf [file pcbi.1008330.s013.pdf]
